# Supplementary material for: Three stable dinuclear [M2(OH)0.5(NO3)0.5(RCOO)2(RN)4] (M = Cu, Ni) based metal–organic frameworks with high CO2 adsorption and selective separation for O2/N2 and C3H8/CH4
Source: Royal Society of Chemistry journal article supplement (doi:10.1039/c9qi01220f), 2019-12-03
Supplement: c9qi01220f1.pdf [file c9qi01220f1.pdf]

## Electronic Supplementary Information (ESI)

### Three stable dinuclear $[M_2(OH)_{0.5}(NO_3)_{0.5}(RCOO)_2(RN)_4]$ ( $M =$ **Cu, Ni**) based metal-organic frameworks with high $CO_2$ adsorption and selective separation for $O_2/N_2$ and $C_3H_8/CH_4$

Liang Kan, Lan Li, Guanghua Li, Lirong Zhang\* and Yunling Liu\*

*State Key Laboratory of Inorganic Synthesis and Preparative Chemistry, College of Chemistry, Jilin University, Changchun 130012, P. R. China. Fax: +86-431-85168624; Tel: +86-431-85168614; E-mail: yunling@jlu.edu.cn, zlr@jlu.edu.cn.*

#### S1. Calculation procedures of selectivity from IAST

The measured experimental data is excess loadings ( $q^{ex}$ ) of the pure components  $CO_2$ ,  $CH_4$ ,  $C_2H_6$  and  $C_3H_8$  for compounds **Cu-L<sub>1</sub>**, **Ni-L<sub>1</sub>** and **Ni-L<sub>2</sub>**, which should be converted to absolute loadings ( $q$ ) firstly.

$$q = q^{ex} + \frac{pV_{pore}}{ZRT}$$

Here  $Z$  is the compressibility factor. The Peng-Robinson equation was used to estimate the value of compressibility factor to obtain the absolute loading, while the measure pore volume is also necessary.

The dual-site Langmuir-Freundlich equation is used for fitting the isotherm data at 298 K.

$$q = q_{m_1} \times \frac{b_1 \times p^{1/n_1}}{1 + b_1 \times p^{1/n_1}} + q_{m_2} \times \frac{b_2 \times p^{1/n_2}}{1 + b_2 \times p^{1/n_2}}$$

Here  $p$  is the pressure of the bulk gas at equilibrium with the adsorbed phase (kPa),  $q$  is the adsorbed amount per mass of adsorbent (mol/kg),  $q_{m_1}$  and  $q_{m_2}$  are the saturation capacities of sites 1 and 2 (mol/kg),  $b_1$  and  $b_2$  are the affinity coefficients of sites 1 and 2 (1/kPa),  $n_1$  and  $n_2$  are the deviations from an ideal homogeneous surface.

The selectivity of preferential adsorption of component 1 over component 2 in a mixture containing 1 and 2, perhaps in the presence of other components too, can be formally defined as

$$S = \frac{q_1/q_2}{p_1/p_2}$$

$q_1$  and  $q_2$  are the absolute component loadings of the adsorbed phase in the mixture. These component loadings are also termed the uptake capacities. We calculate the values of  $q_1$  and  $q_2$  using the Ideal Adsorbed Solution Theory (IAST) of Myers and Prausnitz.



## S2. Supporting Figures

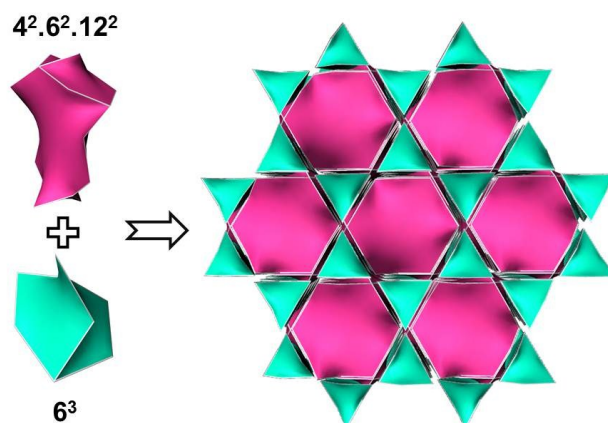

**Fig. S1** Topological features of compound **Cu-L<sub>1</sub>** displayed by tiles and face symbols for green ( $6^3$ ) and pink ( $4^2 \cdot 6^2 \cdot 12^2$ ) tiles.

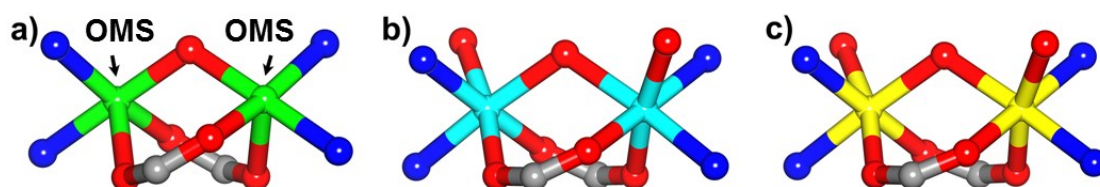

**Fig. S2** Comparison of metal atom coordination modes for compounds **Cu-L<sub>1</sub>** (a), **Ni-L<sub>1</sub>** (b) and **Ni-L<sub>2</sub>** (c).

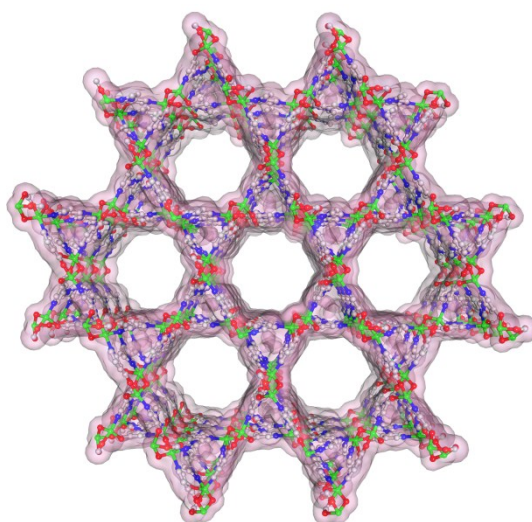

**Fig. S3** The illustration of structure displayed by connolly surface areas.

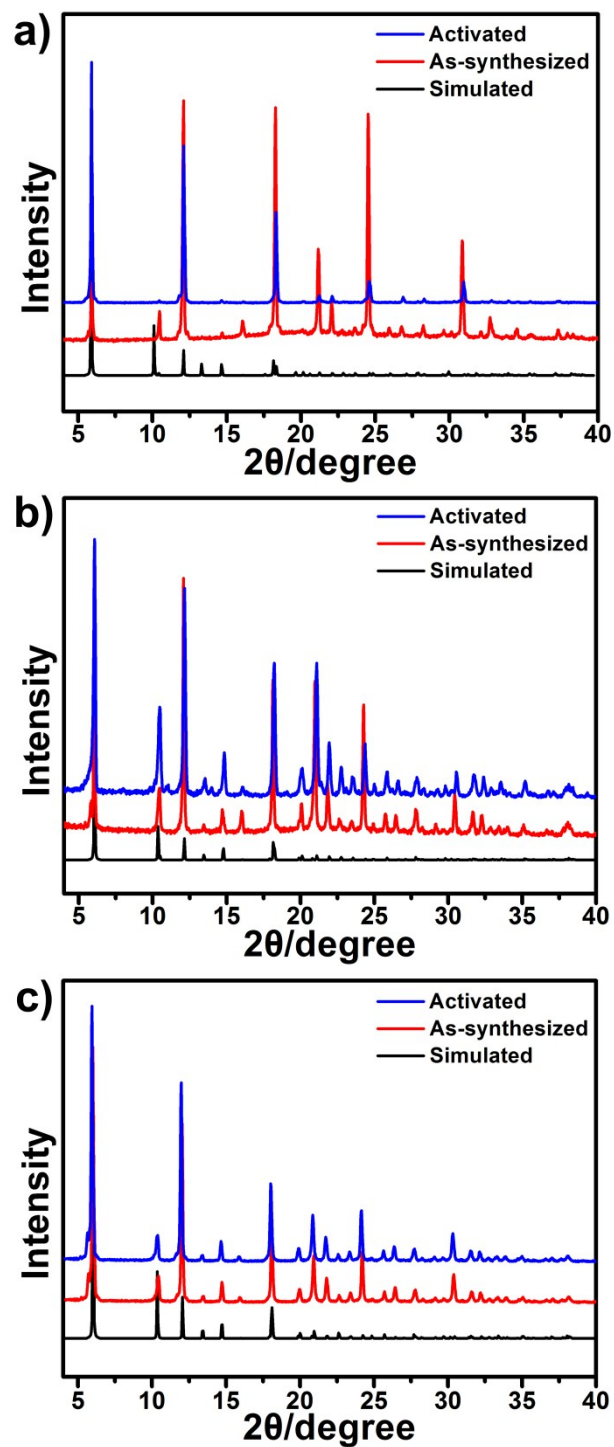

**Fig. S4** PXRD patterns of compounds **Cu-L<sub>1</sub>** (a), **Ni-L<sub>1</sub>** (b) and **Ni-L<sub>2</sub>** (c) for simulated, as-synthesized and activated samples.

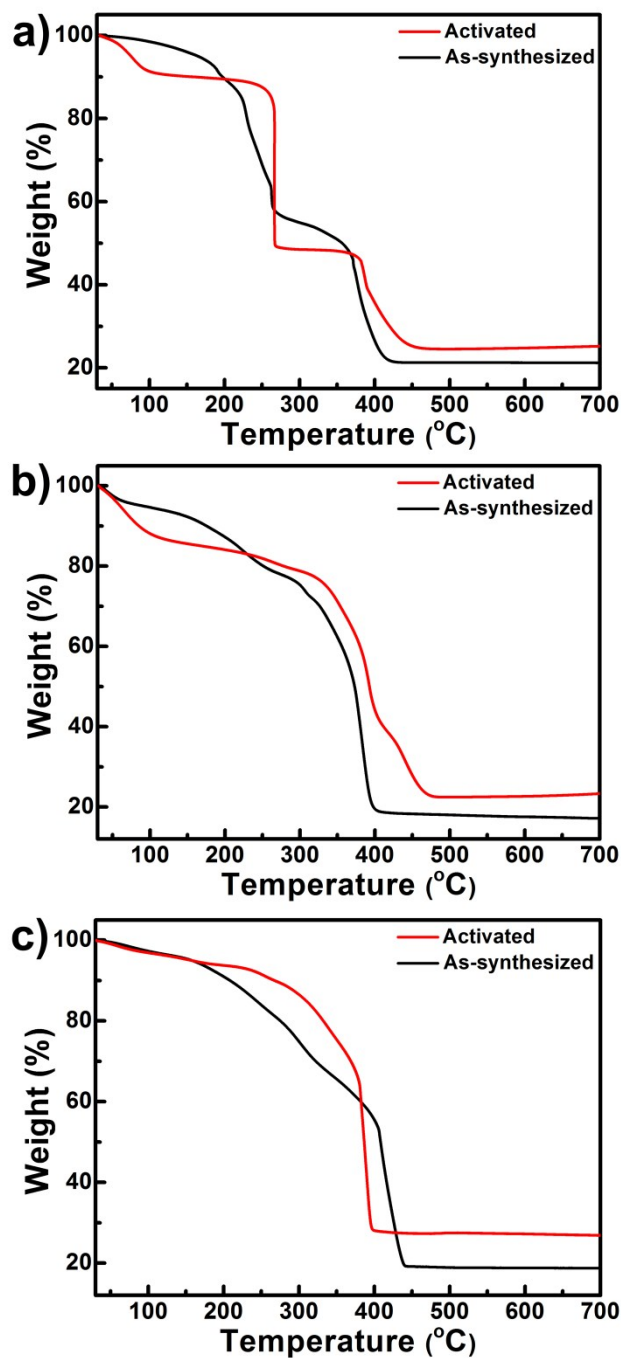

**Fig. S5** Thermogravimetric analysis curves of compounds Cu-L<sub>1</sub> (a), Ni-L<sub>1</sub> (b) and Ni-L<sub>2</sub> (c) for as-synthesized and solvent-exchanged samples.

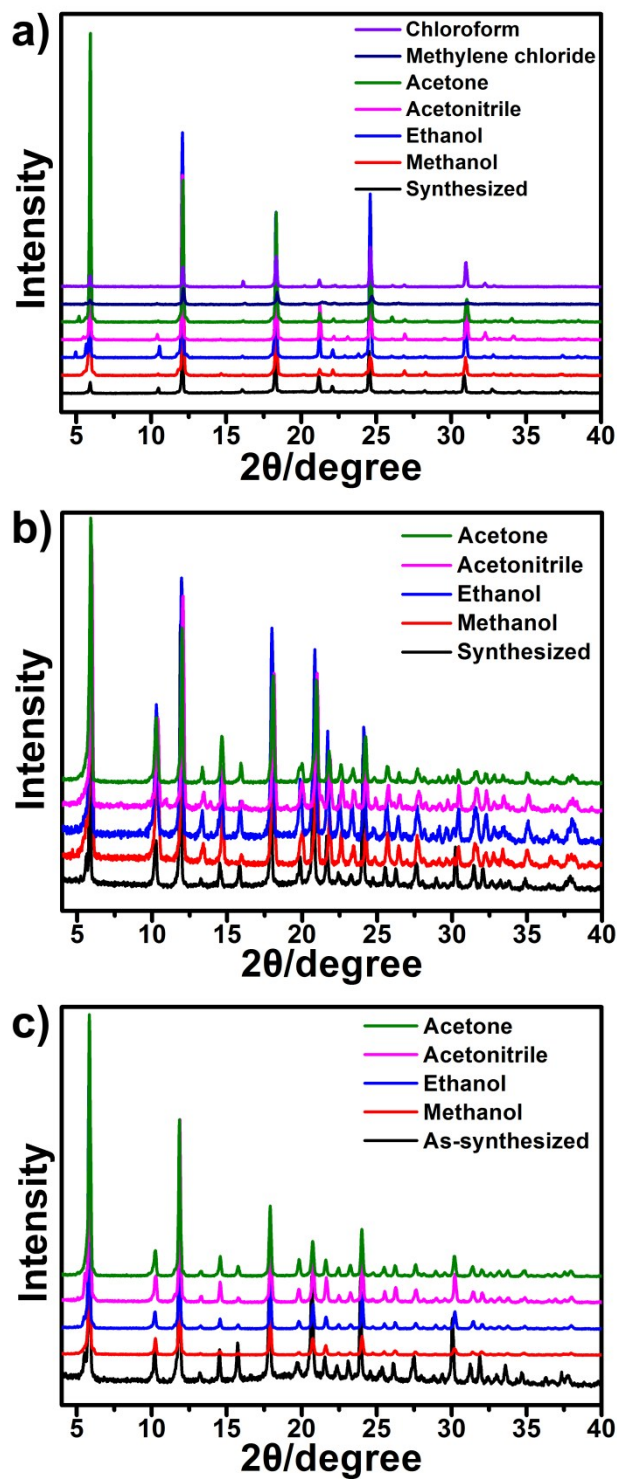

**Fig. S6** XRD patterns of compounds Cu-L<sub>1</sub> (a), Ni-L<sub>1</sub> (b) and Ni-L<sub>2</sub> (c) for solvent-exchanged samples.

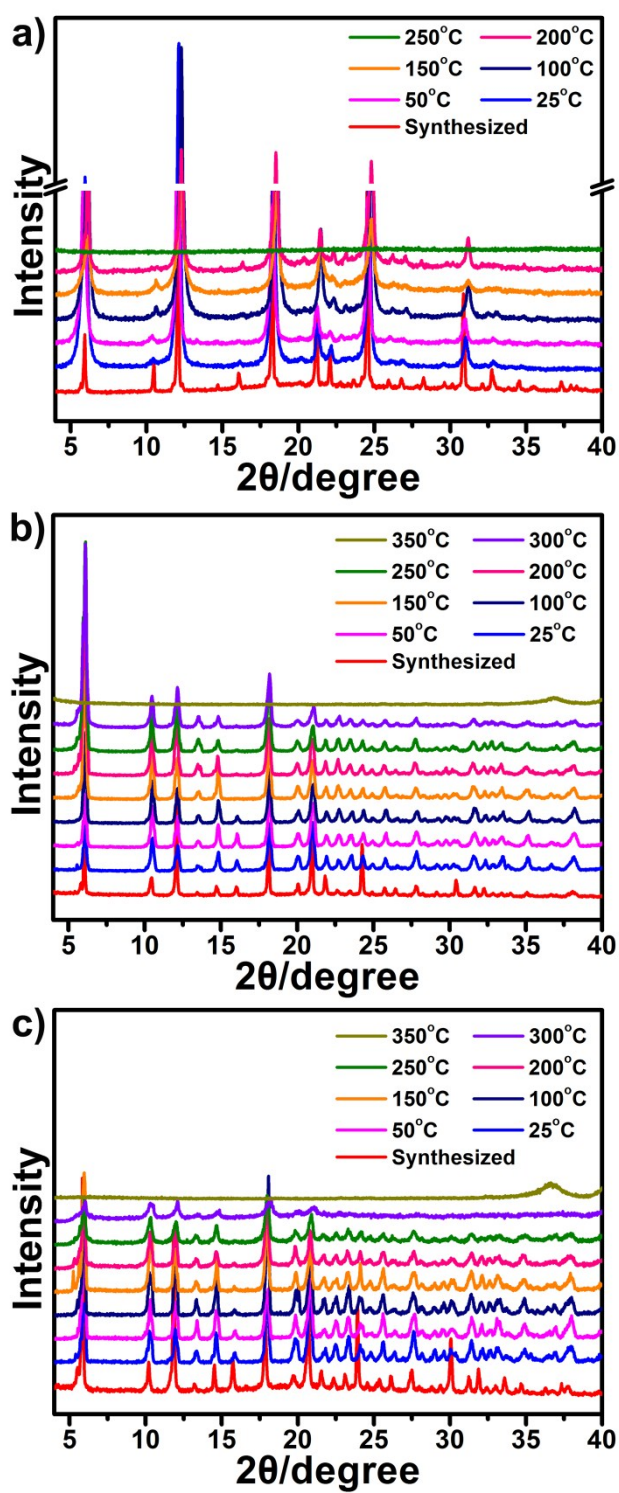

Fig. S7 Varied temperature PXRD patterns of compounds Cu-L<sub>1</sub> (a), Ni-L<sub>1</sub> (b) and Ni-L<sub>2</sub> (c).

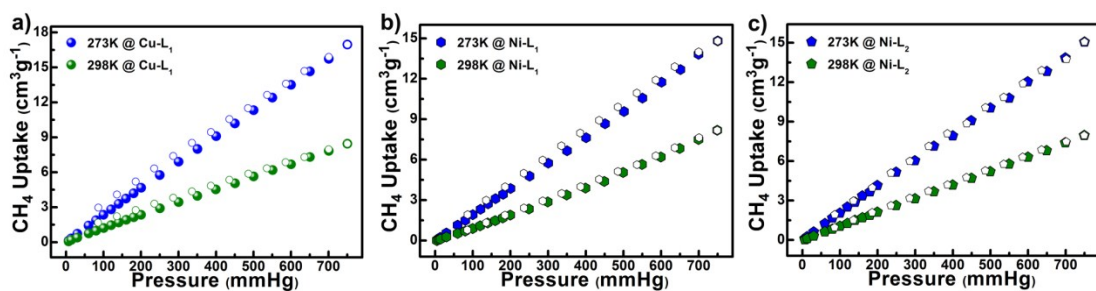

Fig. S8 CH<sub>4</sub> sorption isotherms for compounds Cu-L<sub>1</sub> (a), Ni-L<sub>1</sub> (b) and Ni-L<sub>2</sub> (c) at 273 and 298 K.

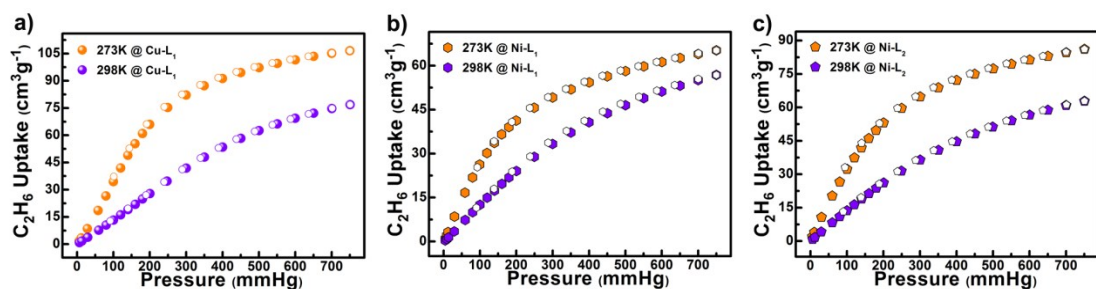

Fig. S9 C<sub>2</sub>H<sub>6</sub> sorption isotherms for compounds Cu-L<sub>1</sub> (a), Ni-L<sub>1</sub> (b) and Ni-L<sub>2</sub> (c) at 273 and 298 K.

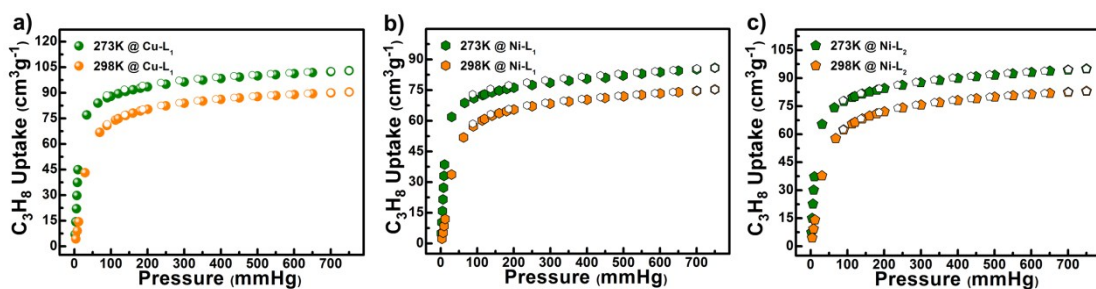

Fig. S10 C<sub>3</sub>H<sub>8</sub> sorption isotherms for compounds Cu-L<sub>1</sub> (a), Ni-L<sub>1</sub> (b) and Ni-L<sub>2</sub> (c) at 273 and 298 K.



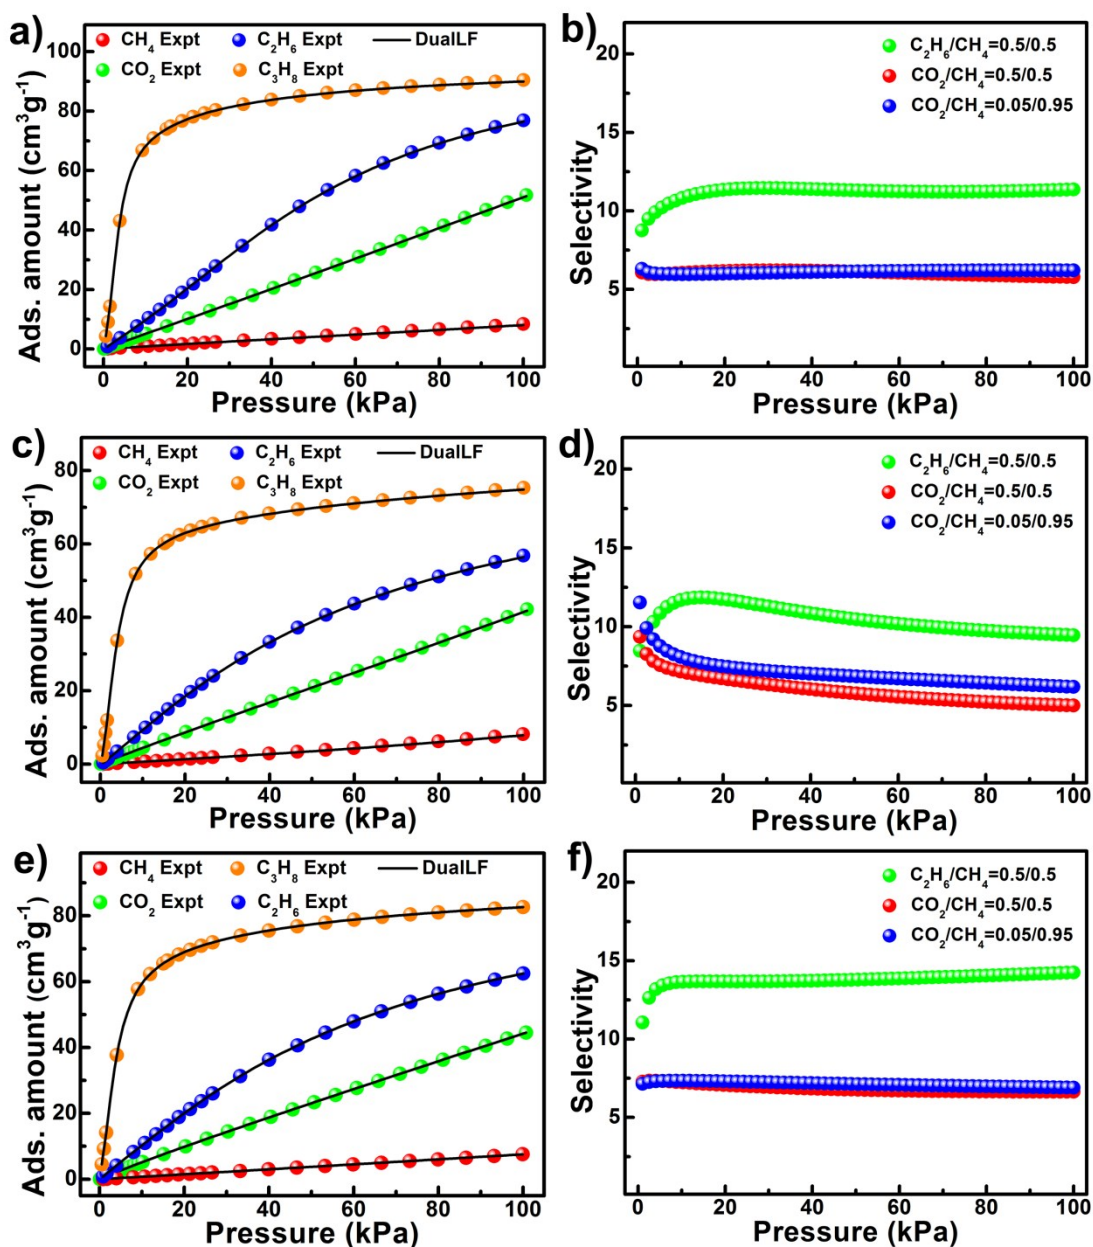

Fig. S11  $\text{CO}_2$ ,  $\text{CH}_4$ ,  $\text{C}_2\text{H}_6$  and  $\text{C}_3\text{H}_8$  adsorption isotherms for compounds **Cu-L<sub>1</sub>** (a), **Ni-L<sub>1</sub>** (c) and **Ni-L<sub>2</sub>** (e) at 298 K along with the dual-site Langmuir Freundlich (DSLFF) fits. The selectivity of  $\text{CO}_2/\text{CH}_4$  and  $\text{C}_2\text{H}_6/\text{CH}_4$  is predicted by IAST at 298 K for compounds **Cu-L<sub>1</sub>** (b), **Ni-L<sub>1</sub>** (d) and **Ni-L<sub>2</sub>** (f).

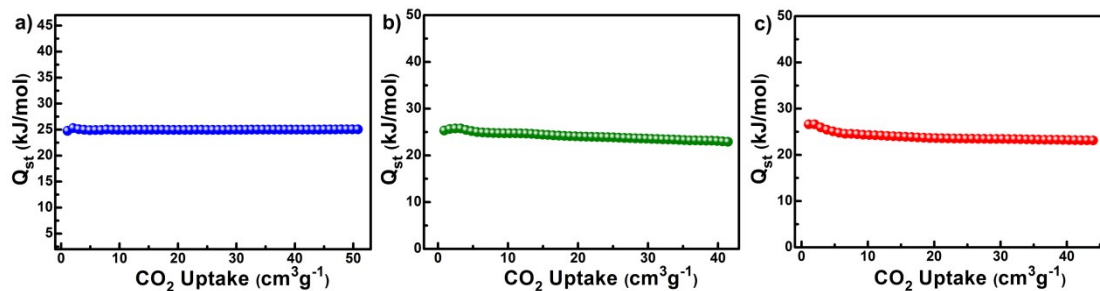

Fig. S12  $Q_{st}$  of  $CO_2$  for compounds Cu-L<sub>1</sub> (a), Ni-L<sub>1</sub> (b) and Ni-L<sub>2</sub> (c).

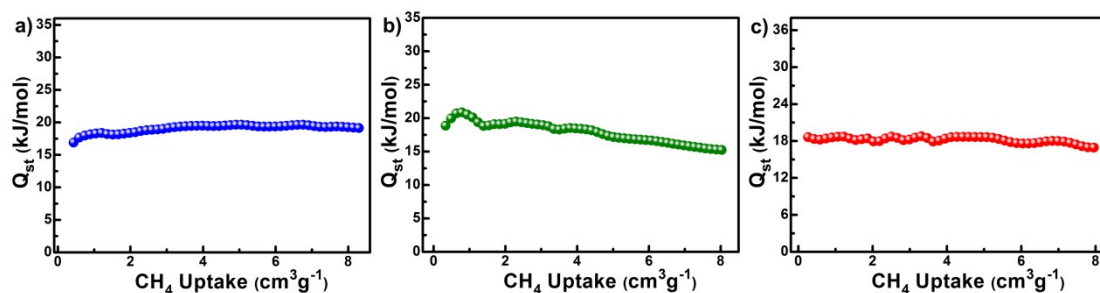

Fig. S13  $Q_{st}$  of  $CH_4$  for compounds Cu-L<sub>1</sub> (a), Ni-L<sub>1</sub> (b) and Ni-L<sub>2</sub> (c).

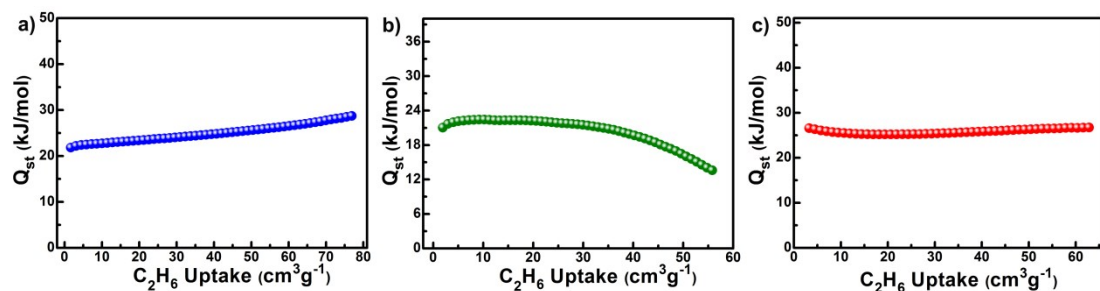

Fig. S14  $Q_{st}$  of  $C_2H_6$  for compounds Cu-L<sub>1</sub> (a), Ni-L<sub>1</sub> (b) and Ni-L<sub>2</sub> (c).

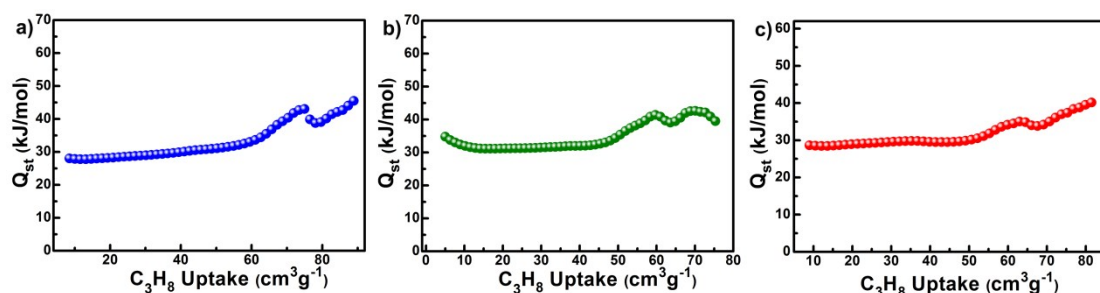

Fig. S15  $Q_{st}$  of  $C_3H_8$  for compounds Cu-L<sub>1</sub> (a), Ni-L<sub>1</sub> (b) and Ni-L<sub>2</sub> (c).

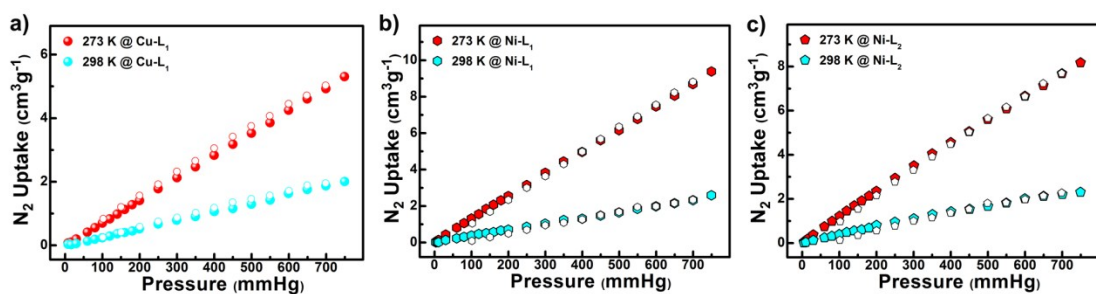

Fig. S16 N<sub>2</sub> sorption isotherms for compounds Cu-L<sub>1</sub> (a), Ni-L<sub>1</sub> (b) and Ni-L<sub>2</sub> (c) at 273 and 298 K.

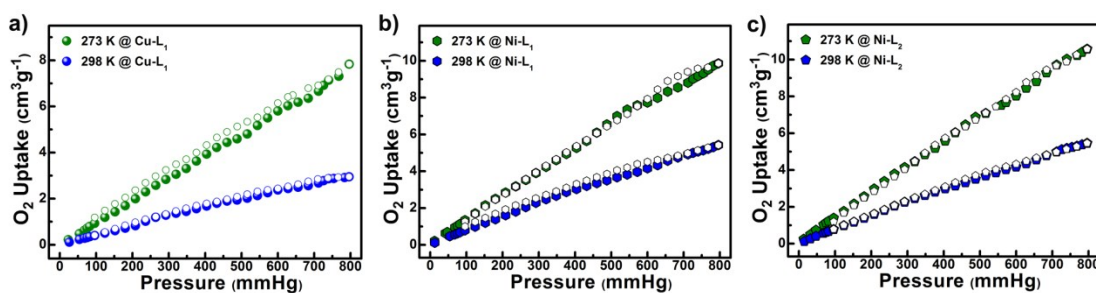

Fig. S17 O<sub>2</sub> sorption isotherms for compounds Cu-L<sub>1</sub> (a), Ni-L<sub>1</sub> (b) and Ni-L<sub>2</sub> (c) at 273 and 298 K.

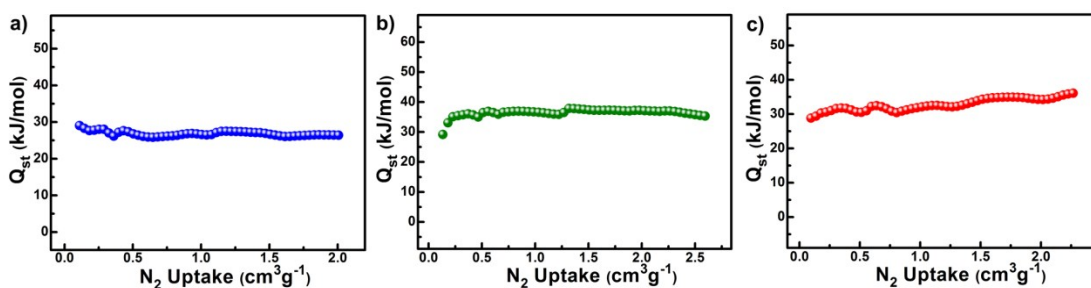

Fig. S18 Q<sub>st</sub> of N<sub>2</sub> for compounds Cu-L<sub>1</sub> (a), Ni-L<sub>1</sub> (b) and Ni-L<sub>2</sub> (c).

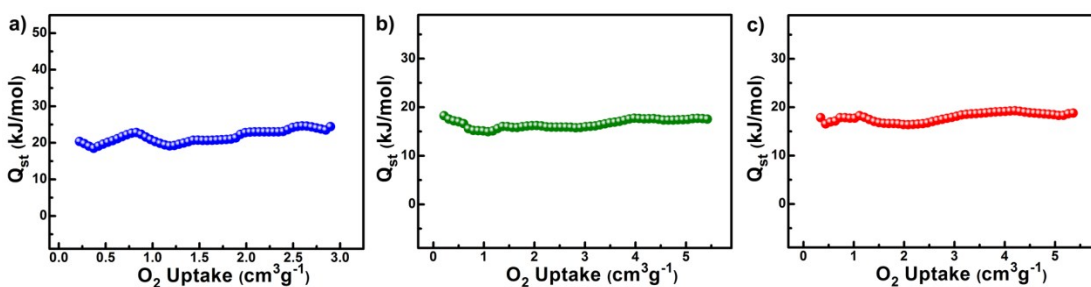

Fig. S19 Q<sub>st</sub> of O<sub>2</sub> for compounds Cu-L<sub>1</sub> (a), Ni-L<sub>1</sub> (b) and Ni-L<sub>2</sub> (c).

### S3. Supporting Tables

**Table S1.** Crystal data and structure refinements for compounds **Cu-L<sub>1</sub>**, **Ni-L<sub>1</sub>** and **Ni-L<sub>2</sub>**.

| Compound                                     | Cu-L <sub>1</sub>                                                               | Ni-L <sub>1</sub>                                                               | Ni-L <sub>2</sub>                                                               |
|----------------------------------------------|---------------------------------------------------------------------------------|---------------------------------------------------------------------------------|---------------------------------------------------------------------------------|
| Formula                                      | C <sub>48</sub> H <sub>53</sub> Cu <sub>4</sub> N <sub>19</sub> O <sub>22</sub> | C <sub>51</sub> H <sub>68</sub> N <sub>20</sub> Ni <sub>4</sub> O <sub>27</sub> | C <sub>47</sub> H <sub>56</sub> N <sub>24</sub> Ni <sub>4</sub> O <sub>23</sub> |
| F <sub>w</sub>                               | 1502.25                                                                         | 1628.09                                                                         | 1559.99                                                                         |
| Temp (K)                                     | 293(2) K                                                                        | 293(2) K                                                                        | 293(2) K                                                                        |
| Crystal system                               | Trigonal                                                                        | Trigonal                                                                        | Trigonal                                                                        |
| Space group                                  | <i>P</i> 3 <sub>2</sub> 21                                                      | <i>P</i> 3 <sub>2</sub> 21                                                      | <i>P</i> 3 <sub>2</sub> 21                                                      |
| a (Å)                                        | 16.547                                                                          | 16.851                                                                          | 16.943                                                                          |
| b (Å)                                        | 16.547                                                                          | 16.851                                                                          | 16.943                                                                          |
| c (Å)                                        | 10.580                                                                          | 10.518                                                                          | 10.504                                                                          |
| α (°)                                        | 90                                                                              | 90                                                                              | 90                                                                              |
| β (°)                                        | 90                                                                              | 90                                                                              | 90                                                                              |
| γ (°)                                        | 120                                                                             | 120                                                                             | 120                                                                             |
| V(Å <sup>3</sup> )                           | 2508.8(9)                                                                       | 2586.6(9)                                                                       | 2611.3(9)                                                                       |
| Z, D <sub>c</sub> (Mg/m <sup>3</sup> )       | 1.50, 1.491                                                                     | 1.50, 1.568                                                                     | 1.50, 1.488                                                                     |
| Absorption coefficient (mm <sup>-1</sup> )   | 1.339                                                                           | 1.170                                                                           | 1.153                                                                           |
| F(000)                                       | 1149                                                                            | 1263                                                                            | 1203                                                                            |
| Reflections collected/unique                 | 16441/3056                                                                      | 17113/3240                                                                      | 17094/3168                                                                      |
| R <sub>int</sub>                             | 0.0368                                                                          | 0.0711                                                                          | 0.0527                                                                          |
| Data/restraints/ parameters                  | 3056/24/148                                                                     | 3240/0/155                                                                      | 3168/110/203                                                                    |
| Goodness-of-fit on F <sup>2</sup>            | 1.107                                                                           | 1.010                                                                           | 1.054                                                                           |
| R <sub>I</sub> , wR <sub>2</sub> [I > 2σ(I)] | 0.0698, 0.1831                                                                  | 0.0440, 0.1115                                                                  | 0.0462, 0.1201                                                                  |
| R <sub>I</sub> , wR <sub>2</sub> (all data)  | 0.0706, 0.1839                                                                  | 0.0517, 0.1157                                                                  | 0.0509, 0.1224                                                                  |

**Table S2.** Selected bond lengths [Å] and angles [°] for compound **Cu-L<sub>1</sub>**.

| Compound <b>Cu-L<sub>1</sub></b> |            |                     |           |
|----------------------------------|------------|---------------------|-----------|
| Cu(1)-O(3)                       | 1.956(5)   | Cu(1)-N(3)          | 2.061(6)  |
| Cu(1)-O(1)#1                     | 1.967(5)   | Cu(1)-O(2)#3        | 2.280(5)  |
| Cu(1)-N(2)#2                     | 2.019(6)   | O(3)-Cu(1)-O(1)#1   | 91.94(19) |
| O(3)-Cu(1)-N(2)#2                | 178.24(18) | O(1)#1-Cu(1)-N(2)#2 | 86.4(2)   |
| O(3)-Cu(1)-N(3)                  | 88.7(2)    | O(1)#1-Cu(1)-N(3)   | 167.6(2)  |
| N(2)#2-Cu(1)-N(3)                | 92.9(2)    | O(3)-Cu(1)-O(2)#3   | 92.5(2)   |
| O(1)#1-Cu(1)-O(2)#3              | 101.6(2)   | N(2)#2-Cu(1)-O(2)#3 | 88.4(2)   |
| N(3)-Cu(1)-O(2)#3                | 90.8(2)    | C(9)-O(1)-Cu(1)#4   | 127.3(4)  |
| C(9)-O(2)-Cu(1)#5                | 124.5(5)   | N(4)-O(3)-Cu(1)     | 121.7(2)  |
| N(4)-O(3)-Cu(1)#6                | 121.7(2)   | Cu(1)-O(3)-Cu(1)#6  | 116.6(5)  |
| C(1)-N(2)-Cu(1)#7                | 123.2(5)   | C(3)-N(2)-Cu(1)#7   | 132.0(5)  |
| C(7)-N(3)-Cu(1)                  | 121.2(4)   | C(8)-N(3)-Cu(1)     | 119.8(4)  |

Symmetry transformations used to generate equivalent atoms:

#1 y,x+1,-z #2 -x+y,-x+1,z-2/3 #3 -x+y,-x+1,z+1/3 #4 y-1,x,-z #5 -y+1,x-y+1,z-1/3

#6 x-y+1,-y+2,-z+1/3 #7 -y+1,x-y+1,z+2/3

**Table S3.** Selected bond lengths [Å] and angles [°] for compound **Ni-L<sub>1</sub>**.

| Compound <b>Ni-L<sub>1</sub></b> |            |                     |            |
|----------------------------------|------------|---------------------|------------|
| Ni(1)-O(1)#1                     | 2.012(4)   | Ni(1)-N(2)#2        | 2.063(5)   |
| Ni(1)-O(2)#3                     | 2.079(4)   | Ni(1)-O(4)          | 2.085(5)   |
| Ni(1)-O(3)                       | 2.097(4)   | Ni(1)-N(3)          | 2.100(5)   |
| O(1)#1-Ni(1)-N(2)#2              | 84.75(19)  | O(1)#1-Ni(1)-O(2)#3 | 98.50(17)  |
| N(2)#2-Ni(1)-O(2)#3              | 87.53(18)  | O(1)#1-Ni(1)-O(4)   | 87.46(18)  |
| N(2)#2-Ni(1)-O(4)                | 87.6(2)    | O(2)#3-Ni(1)-O(4)   | 171.91(19) |
| O(1)#1-Ni(1)-O(3)                | 88.54(16)  | N(2)#2-Ni(1)-O(3)   | 173.23(16) |
| O(2)#3-Ni(1)-O(3)                | 94.35(16)  | O(4)-Ni(1)-O(3)     | 91.2(2)    |
| O(1)#1-Ni(1)-N(3)                | 173.64(18) | N(2)#2-Ni(1)-N(3)   | 93.5(2)    |
| O(2)#3-Ni(1)-N(3)                | 87.50(19)  | O(4)-Ni(1)-N(3)     | 86.4(2)    |
| O(3)-Ni(1)-N(3)                  | 93.12(17)  | C(9)-O(1)-Ni(1)#4   | 132.3(3)   |
| C(9)-O(2)-Ni(1)#5                | 129.9(4)   | N(4)-O(3)-Ni(1)     | 123.12(15) |
| N(4)-O(3)-Ni(1)#6                | 123.12(15) | Ni(1)-O(3)-Ni(1)#6  | 113.8(3)   |
| C(7)-N(3)-Ni(1)                  | 121.1(4)   | C(8)-N(3)-Ni(1)     | 119.3(4)   |
| C(1)-N(2)-Ni(1)#7                | 123.3(5)   | C(3)-N(2)-Ni(1)#7   | 129.2(4)   |

Symmetry transformations used to generate equivalent atoms:

#1  $y, x-1, -z$  #2  $-x+y+1, -x+1, z-2/3$  #3  $-x+y+1, -x+1, z+1/3$  #4  $y+1, x, -z$  #5  $-y+1, x-y, z-1/3$   
 #6  $x-y, -y, -z+1/3$  #7  $-y+1, x-y, z+2/3$

**Table S4.** Selected bond lengths [Å] and angles [°] for compound **Ni-L<sub>2</sub>**.

| Compound <b>Ni-L<sub>2</sub></b> |            |                     |            |
|----------------------------------|------------|---------------------|------------|
| Ni(1)-O(1)#1                     | 2.012(5)   | Ni(1)-O(2)#2        | 2.066(4)   |
| Ni(1)-O(3)                       | 2.066(4)   | Ni(1)-N(3)#3        | 2.095(6)   |
| Ni(1)-N(4)                       | 2.096(5)   | Ni(1)-O(4)          | 2.122(5)   |
| O(1)#1-Ni(1)-O(2)#2              | 98.2(2)    | O(1)#1-Ni(1)-O(3)   | 89.73(17)  |
| O(2)#2-Ni(1)-O(3)                | 95.33(18)  | O(1)#1-Ni(1)-N(3)#3 | 85.1(2)    |
| O(2)#2-Ni(1)-N(3)#3              | 86.8(2)    | O(3)-Ni(1)-N(3)#3   | 174.62(18) |
| O(1)#1-Ni(1)-N(4)                | 174.0(2)   | O(2)#2-Ni(1)-N(4)   | 87.1(2)    |
| O(3)-Ni(1)-N(4)                  | 92.51(19)  | N(3)#3-Ni(1)-N(4)   | 92.5(2)    |
| O(1)#1-Ni(1)-O(4)                | 87.7(2)    | O(2)#2-Ni(1)-O(4)   | 168.9(2)   |
| O(3)-Ni(1)-O(4)                  | 94.1(2)    | N(3)#3-Ni(1)-O(4)   | 84.3(2)    |
| N(4)-Ni(1)-O(4)                  | 86.6(2)    | C(8)-O(1)-Ni(1)#6   | 133.0(4)   |
| C(8)-O(2)-Ni(1)#7                | 129.0(4)   | N(7)-O(3)-Ni(1)     | 122.89(15) |
| N(7)-O(3)-Ni(1)#4                | 122.89(15) | Ni(1)-O(3)-Ni(1)#4  | 114.2(3)   |
| C(9)-O(4)-Ni(1)                  | 133.0(9)   | N(6)-O(4)-Ni(1)     | 114.9(9)   |
| C(2)-N(3)-Ni(1)#8                | 121.0(5)   | C(1)-N(3)-Ni(1)#8   | 133.2(7)   |
| C(1')-N(3)-Ni(1)#8               | 126.4(7)   | C(4)-N(4)-Ni(1)     | 119.4(5)   |
| C(5)-N(4)-Ni(1)                  | 122.4(4)   |                     |            |

Symmetry transformations used to generate equivalent atoms:

#1  $y, x-1, -z$  #2  $-x+y+1, -x+1, z+1/3$  #3  $-x+y+1, -x+1, z-2/3$  #4  $x-y, -y, -z+1/3$  #5  $x-y, -y, -z-2/3$

#6  $y+1, x, -z$    #7  $-y+1, x-y, z-1/3$    #8  $-y+1, x-y, z+2/3$

**Table S5.** Comparison of CO<sub>2</sub> adsorption data at 273 K.

| Compound                                                                                              | BET<br>(m <sup>2</sup> g <sup>-1</sup> ) | CO <sub>2</sub><br>(cm <sup>3</sup> g <sup>-1</sup> ) | Q <sub>st</sub><br>(kJ mol <sup>-1</sup> ) | Ref.             |
|-------------------------------------------------------------------------------------------------------|------------------------------------------|-------------------------------------------------------|--------------------------------------------|------------------|
| <b>Cu-L<sub>1</sub></b>                                                                               | <b>716</b>                               | <b>115</b>                                            | <b>24.8</b>                                | <b>This work</b> |
| JLU-Liu47                                                                                             | 1800                                     | 192                                                   | 35                                         | 1                |
| Cu-TDPAT                                                                                              | 1938                                     | 227                                                   | 42.2                                       | 2                |
| CPM-200-Fe/Mg                                                                                         | 1459                                     | 207.6                                                 | 34.3                                       | 3                |
| IFMC-1                                                                                                | 780                                      | 91.4                                                  | 30.7                                       | 4                |
| JLU-Liu38                                                                                             | 1784                                     | 92.6                                                  | 24                                         | 5                |
| CPM-20                                                                                                | 1009                                     | 91.2                                                  |                                            | 6                |
| FJI-C1                                                                                                | 1726.3                                   | 64                                                    | 20.7                                       | 7                |
| (Et <sub>2</sub> NH <sub>2</sub> )[In(2,6-NDC) <sub>2</sub> ]·2H <sub>2</sub> O·DEF                   | 891                                      | 72.2                                                  | 19.6                                       | 8                |
| [H <sub>2</sub> N(CH <sub>3</sub> ) <sub>2</sub> ][In(4,4'BPDC) <sub>2</sub> ]·4DMF·2H <sub>2</sub> O | 638                                      | 34                                                    | 25.8                                       | 9                |
| [Cu(F-pymo) <sub>2</sub> ] <sub>n</sub>                                                               |                                          | 38.7                                                  | 49-55                                      | 10               |
| NOTT-202a                                                                                             | 2220                                     | ~56                                                   | 20-25                                      | 11               |
| InOF-15                                                                                               | 935.6                                    | 78                                                    | 31.1                                       | 12               |

“~”represent approximate values are obtained from the figures of reported articles.

**Table S6.** Comparison of C<sub>3</sub>H<sub>8</sub>/CH<sub>4</sub> selectivity (0.5/0.5) at 101 kPa and 298 K of compounds **Cu-L<sub>1</sub>** and **Ni-L<sub>2</sub>** with the reported MOFs.

| Compound                                                                                   | C <sub>3</sub> H <sub>8</sub> /CH <sub>4</sub><br>(0.5/0.5) | Ref.             |
|--------------------------------------------------------------------------------------------|-------------------------------------------------------------|------------------|
| <b>Cu-L<sub>1</sub></b>                                                                    | <b>175</b>                                                  | <b>This work</b> |
| <b>Ni-L<sub>2</sub></b>                                                                    | <b>167</b>                                                  | <b>This work</b> |
| UPC-33                                                                                     | 41.8                                                        | 13               |
| BSF-1                                                                                      | 353                                                         | 14               |
| [Cu <sub>4</sub> (PMTD) <sub>2</sub> (H <sub>2</sub> O) <sub>3</sub> ]·20 H <sub>2</sub> O | ~105                                                        | 15               |
| JLU-Liu23                                                                                  | 273                                                         | 16               |
| JLU-MOF51                                                                                  | 220                                                         | 17               |
| [Zn <sub>24</sub> (BDPO) <sub>12</sub> (DMF) <sub>12</sub> ]·6DMF·52H <sub>2</sub> O       | 125                                                         | 18               |
| FJI-C4                                                                                     | 293                                                         | 19               |
| UTSA-35a                                                                                   | ~80                                                         | 20               |
| eea-MOF-4                                                                                  | 136                                                         | 21               |

“~”represent approximate values are obtained from the figures of reported articles.

**Table S7.** The refined parameters for the Dual-site Langmuir-Freundlich equations fit for the pure isotherms of CO<sub>2</sub>, CH<sub>4</sub>, C<sub>2</sub>H<sub>6</sub> and C<sub>3</sub>H<sub>8</sub> for compounds **Cu-L<sub>1</sub>**, **Ni-L<sub>1</sub>** and **Ni-L<sub>2</sub>** at 298 K.

| <b>Cu-L<sub>1</sub></b>       | <b>q<sub>m1</sub></b> | <b>b<sub>1</sub></b> | <b>1/n<sub>1</sub></b> | <b>q<sub>m2</sub></b> | <b>b<sub>2</sub></b> | <b>1/n<sub>2</sub></b> | <b>R<sup>2</sup></b> |
|-------------------------------|-----------------------|----------------------|------------------------|-----------------------|----------------------|------------------------|----------------------|
| CO <sub>2</sub>               | 0.38684               | 0.04058              | 0.88895                | 29.56189              | 2.91706E-4           | 1.1983                 | 1                    |
| CH <sub>4</sub>               | 1                     | 0.00415              | 0.99341                | 1.9418                | 4.33339E-7           | 2.47973                | 0.99995              |
| C <sub>2</sub> H <sub>6</sub> | 3.58732               | 5.40009E-4           | 1.88337                | 0.7894                | 0.05024              | 1.06683                | 1                    |
| C <sub>3</sub> H <sub>8</sub> | 2.25703               | 0.05579              | 2.40374                | 2.13085               | 0.1294               | 0.78189                | 0.99999              |

  

| <b>Ni-L<sub>1</sub></b>       | <b>q<sub>m1</sub></b> | <b>b<sub>1</sub></b> | <b>1/n<sub>1</sub></b> | <b>q<sub>m2</sub></b> | <b>b<sub>2</sub></b> | <b>1/n<sub>2</sub></b> | <b>R<sup>2</sup></b> |
|-------------------------------|-----------------------|----------------------|------------------------|-----------------------|----------------------|------------------------|----------------------|
| CO <sub>2</sub>               | 7                     | 0.00299              | 0.98054                | 16.49958              | 1.02113E-6           | 2.16191                | 0.99999              |
| CH <sub>4</sub>               | 2.76023               | 9.25777E-6           | 1.98086                | 0.2                   | 0.01038              | 1.15305                | 0.9999               |
| C <sub>2</sub> H <sub>6</sub> | 0.02944               | 0.11866              | 2.24535                | 3.80853               | 0.00678              | 1.22221                | 0.99999              |
| C <sub>3</sub> H <sub>8</sub> | 2.51574               | 0.08526              | 1.86066                | 3.04433               | 0.02843              | 0.56059                | 0.99998              |

  

| <b>Ni-L<sub>2</sub></b>       | <b>q<sub>m1</sub></b> | <b>b<sub>1</sub></b> | <b>1/n<sub>1</sub></b> | <b>q<sub>m2</sub></b> | <b>b<sub>2</sub></b> | <b>1/n<sub>2</sub></b> | <b>R<sup>2</sup></b> |
|-------------------------------|-----------------------|----------------------|------------------------|-----------------------|----------------------|------------------------|----------------------|
| CO <sub>2</sub>               | 0.75267               | 0.02757              | 0.92348                | 17.66724              | 2.77914E-4           | 1.25814                | 1                    |
| CH <sub>4</sub>               | 1.06409               | 0.00329              | 0.9113                 | 2.22501               | 1.02406E-4           | 1.4184                 | 0.99985              |
| C <sub>2</sub> H <sub>6</sub> | 4.01293               | 0.00478              | 1.30441                | 0.14241               | 0.23661              | 1.09311                | 1                    |
| C <sub>3</sub> H <sub>8</sub> | 2.17334               | 0.10758              | 0.61134                | 2.29706               | 0.08328              | 1.88911                | 1                    |

**Table S8.** Comparison of O<sub>2</sub>/N<sub>2</sub> selectivity at 20 kPa and 77 K.

| <b>Compound</b>         | <b>O<sub>2</sub>/N<sub>2</sub></b> | <b>Q<sub>st</sub> of O<sub>2</sub> (kJ/mol)</b> | <b>Ref.</b>      |
|-------------------------|------------------------------------|-------------------------------------------------|------------------|
| <b>Cu-L<sub>1</sub></b> | <b>1.44</b>                        | <b>24.4</b>                                     | <b>This work</b> |
| <b>Ni-L<sub>1</sub></b> | <b>1.34</b>                        | <b>17.6</b>                                     | <b>This work</b> |
| <b>Ni-L<sub>2</sub></b> | <b>1.45</b>                        | <b>18.8</b>                                     | <b>This work</b> |
| Mn/Cu-BTC               | 1.32                               | ~14                                             | 22               |
| Fe/Cu-BTC               | 1.27                               | ~14                                             | 22               |
| Co/Cu-BTC               | 1.27                               | 15.7                                            | 22               |
| Cu-BTC                  | 1.13                               | 10.7                                            | 22               |
| JLU-Liu31               | 1.34                               | -                                               | 23               |
| JLU-Liu18               | 1.24                               | 16                                              | 24               |

“~”represent approximate values are obtained from the figures of reported articles.



## References:

1. B. Liu, S. Yao, X. Y. Liu, X. Li, R. Krishna, G. H. Li, Q. H. Huo and Y. L. Liu, *ACS Appl. Mater. Interfaces*, 2017, **9**, 32820-32828.
2. B. Y. Li, Z. J. Zhang, Y. Li, K. X. Yao, Y. H. Zhu, Z. Y. Deng, F. Yang, X. J. Zhou, G. H. Li, H. H. Wu, N. Nijem, Y. J. Chabal, Z. Shi, S. H. Feng and J. Li, *Angew. Chem., Int. Ed.*, 2012, **51**, 1412-1415.
3. Q. G. Zhai, X. Bu, C. Mao, X. Zhao and P. Feng, *J. Am. Chem. Soc.*, 2016, **138**, 2524-2527.
4. J. Qin, D. Du, W. Li, J. Zhang, S. Li, Z. Su, X. Wang, Q. Xu, K. Shao and Y. Lan, *Chem. Sci.*, 2012, **3**, 2114.
5. J. T. Li, X. L. Luo, N. Zhao, L. R. Zhang, Q. S. Huo and Y. L. Liu, *Inorg. Chem.*, 2017, **56**, 4141-4147.
6. S. T. Zheng, T. Wu, C. Chou, A. Fuhr, P. Feng and X. Bu, *J. Am. Chem. Soc.*, 2012, **134**, 4517-4520.
7. Y. Huang, Z. Lin, H. Fu, F. Wang, M. Shen, X. Wang and R. Cao, *ChemSusChem*, 2014, **7**, 2647-2653.
8. J. M. Gu, J. Y. Hong, Y. S. Won, S. S. Park and S. Huh, *Eur. J. Inorg. Chem.*, 2015, 4038-4043.
9. J. M. Gu, S. J. Kim, Y. Kim and S. Huh, *CrystEngComm*, 2012, **14**, 1819-1824.
10. J. A. R. Navarro, E. Barea, A. R. Dieguez, J. M. Salas, C. O. Ania, J. B. Parra, N. Masciocchi, S. Galli and A. Sironi, *J. Am. Chem. Soc.*, 2008, **130**, 3978-3984.
11. S. Yang, X. Lin, W. Lewis, M. Suyetin, E. Bichoutskaia, J. E. Parker, C. C. Tang, D. R. Allan, P. J. Rizkallah, P. Hubberstey, N. R. Champness, K. M. Thomas, A. J. Blake and M. Schröder, *Nat Mater*, 2012, 710-716.
12. J. Qian, Q. Li, L. Liang, T. T. Li, Y. Hu and S. Huang, *Dalton Trans*, 2017, **46**, 14102-14106.
13. W. Fan, Y. Wang, Q. Zhang, A. Kirchon, Z. Xiao, L. Zhang, F. Dai, R. Wang and D. Sun, *Chem. Eur. J.*, 2018, **24**, 2137-2143.
14. Y. B. Zhang, L. F. Yang, L. Y. Wang, S. Duttwyler and H. Xing, *Angew. Chem. Int. Ed.*, 2019, **58**, 8145-8150.
15. L. Meng, Z. Niu, C. Liang, X. Dong, K. Liu, G. Li, C. Li, Y. Han, Z. Shi and S. Feng, *Chem. Eur. J.*, 2018, **24**, 13181-13187.
16. X. Luo, Y. Cao, T. Wang, G. Li, J. Li, Y. Yang, Z. Xu, J. Zhang, Q. Huo, Y. Liu and M. Eddaoudi, *J. Am. Chem. Soc.*, 2016, **138**, 786-789.
17. D. Wang, J. Zhang, G. Li, J. Yuan, J. Li, Q. Huo and Y. Liu, *ACS Appl. Mater. Interfaces*, 2018, **10**, 31233-31239.
18. H. He, D. Y. Zhang, F. Guo and F. Sun, *Inorg. Chem.*, 2018, **57**, 7314-7320.
19. L. Li, X. Wang, J. Liang, Y. Huang, H. Li, Z. Lin and R. Cao, *ACS Appl. Mater. Interfaces*, 2016, **8**, 9777-9781.
20. Y. He, Z. Zhang, S. Xiang, F. R. Fronczek, R. Krishna and B. Chen, *Chem. Commun.*, 2012, **48**, 6493-6495.
21. Z. Chen, K. Adil, Ł. J. Weselinski, Y. Belmabkhout and M. Eddaoudi, *J. Mater. Chem. A.*, 2015, **3**, 6276-6281.
22. D. F. Sava Gallis, M. V. Parkes, J. A. Greathouse, X. Zhang and T. M. Nenoff, *Chem. Mater.*, 2015, **27**, 2018-2025.
23. S. Yao, X. D. Sun, B. Liu, R. Krishna, G. H. Li, Q. S. Huo and Y. L. Liu, *J. Mater. Chem. A.*

2016, **4**, 15081-15087.

24. S. Yao, D. M. Wang, Y. Cao, G. H. Li, Q. S. Huo and Y. L. Liu, *J. Mater. Chem. A*, 2015, **3**, 16627-16632.
